# Supplementary material for: Clostridium perfringens Associated with Foodborne Infections of Animal Origins: Insights into Prevalence, Antimicrobial Resistance, Toxin Genes Profiles, and Toxinotypes
Source: MDPI journal article supplement (doi:10.3390/biology11040551), 2022-04-01
Supplement: s1 [file s1]

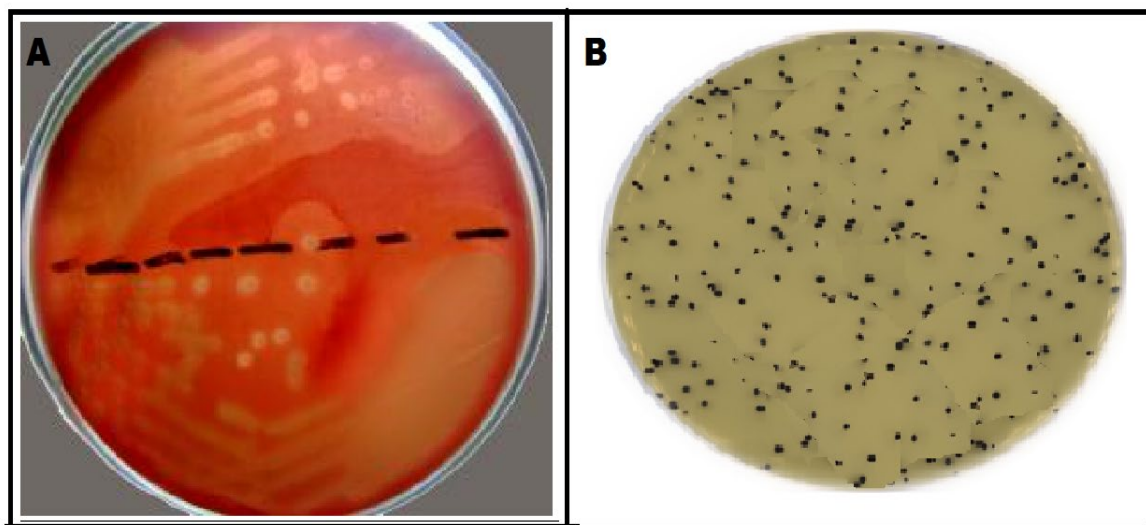

**Figure S1.** Cultural characters of *C. perfringens* isolates on blood agar (A) showing double zone of hemolysis and on tryptose sulfite cycloserine agar (B) demonstrating typical characteristic black colonies.

**Table S1.** Sources, numbers, locality, and distribution of the collected samples in the current study.

| Locality     | Supermarket Code | Number of Collected Samples |           |              | Total      |
|--------------|------------------|-----------------------------|-----------|--------------|------------|
|              |                  | Raw Milk                    | Beef      | Chicken Meat |            |
| Sharkia      | A                | 10                          | 10        | 10           | 30         |
|              | B                | 10                          | 10        | 10           | 30         |
|              | C                | 10                          | 10        | 10           | 30         |
|              | D                | 10                          | 10        | 10           | 30         |
|              | E                | 10                          | 10        | 10           | 30         |
|              | F                | 10                          | 10        | 10           | 30         |
|              | G                | 10                          | 10        | 10           | 30         |
|              | H                | 10                          | 10        | 10           | 30         |
| <b>Total</b> |                  | <b>80</b>                   | <b>80</b> | <b>80</b>    | <b>240</b> |
| Port Said    | I                | 10                          | 10        | 10           | 30         |
|              | II               | 10                          | 10        | 10           | 30         |
|              | III              | 10                          | 10        | 10           | 30         |
|              | IV               | 10                          | 10        | 10           | 30         |
|              | V                | 10                          | 10        | 10           | 30         |
|              | VI               | 10                          | 10        | 10           | 30         |
|              | VII              | 10                          | 10        | 10           | 30         |
| <b>Total</b> |                  | <b>70</b>                   | <b>70</b> | <b>70</b>    | <b>210</b> |

**Table S2.** Interpretation of minimum inhibitory concentration values of different antimicrobial agents against *Clostridium perfringens*.

| Antimicrobial Agent         | Symbol | Interpretative Categories and MIC Breakpoints (µg/mL) |     |
|-----------------------------|--------|-------------------------------------------------------|-----|
|                             |        | S                                                     | R   |
| Ampicillin                  | AMP    | ≤4                                                    | >8  |
| Amoxicillin/clavulanic acid | AMC    | ≤4                                                    | >8  |
| Cefoxitin                   | FOX    | ≤16                                                   | ≥64 |
| Enrofloxacin                | ENR    | ≤2                                                    | ≥8  |
| Imipenem                    | IMP    | ≤2                                                    | >8  |
| Chloramphenicol             | C      | ≤8                                                    | >8  |
| Lincomycin                  | L      | ≤2                                                    | ≥8  |
| Metronidazole               | MTZ    | ≤4                                                    | >4  |
| Erythromycin                | E      | ≤2                                                    | ≥8  |
| Tetracycline                | TE     | ≤4                                                    | ≥16 |
